# Supplementary material for: Curcumin inhibits lipolysis via suppression of ER stress in adipose tissue and prevents hepatic insulin resistance
Source: PubMed Central journal article supplement (PMC4918853; doi:10.1194/jlr.m067397), 2016-07
Supplement: 10.1194_M067397_jlr.M067397-1.pdf [file 10.1194_M067397_jlr.M067397-1.pdf]

Supplementary Figure:

Figure 1

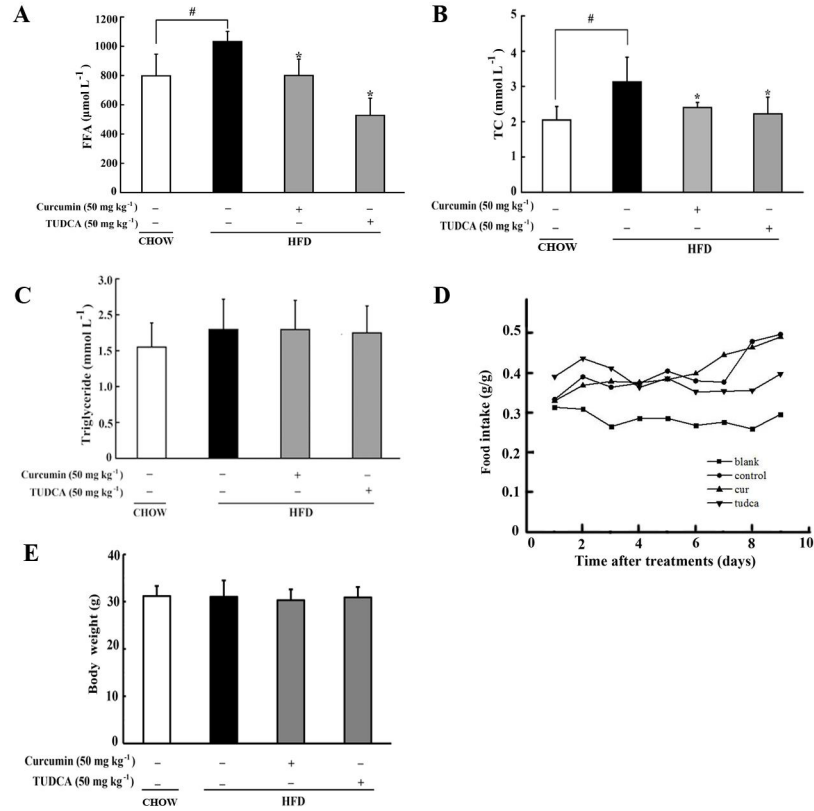

**Supplementary Fig. 1** Mice were fed with HFD for 10 days with oral administration of curcumin (50 mg kg<sup>-1</sup>) or TUDCA (50 mg kg<sup>-1</sup>). Serum : FFAs (A), TC (B) and triglyceride (C) were determined by kit. Data were expressed as the mean ± SD (n=6). (D): Food intake; (E): Body weight gain in HFD-fed mice. The results were expressed as the mean ± SD (n=10). \**p* < 0.05 vs model; #*p* < 0.05 vs control.
